# Supplementary material for: Zn-MOF@rGO nanocomposite: a versatile tool for highly selective and sensitive detection of Pb2+ and Cu2+ ions in water
Source: Royal Society of Chemistry journal article supplement (doi:10.1039/d4ay00987h), 2024-01-01
Supplement: d4ay00987h1.pdf [file d4ay00987h1.pdf]

## Supplementary Information

### Zn-MOF@rGO Nanocomposite: A Versatile Tool for Highly Selective and Sensitive Detection of Pb<sup>2+</sup> and Cu<sup>2+</sup> Ions in Water

Ajay Kumar,<sup>a,b</sup> Kuldeep Kumar,<sup>c</sup> Kirtanjot Kaur,<sup>d</sup> Kushal Arya,<sup>a</sup> Surinder Kumar Mehta,<sup>a</sup> Surinder Singh<sup>c\*</sup> and Ramesh Kataria<sup>a\*</sup>

<sup>a</sup>Department of Chemistry and Centre of Advanced Studies in Chemistry,  
Panjab University, Chandigarh-160014, India.

<sup>b</sup>Department of Chemistry, University Institute of Sciences, Chandigarh University, Mohali,  
Punjab, India-140301

<sup>c</sup>Dr. S. S. Bhatnagar University, Institute of Chemical Engineering,  
Panjab University, Chandigarh-160014, India.

<sup>d</sup>University Centre for Research and Development, Chandigarh University, Mohali, Punjab,  
India-140301

Email: [rkataria@pu.ac.in](mailto:rkataria@pu.ac.in)

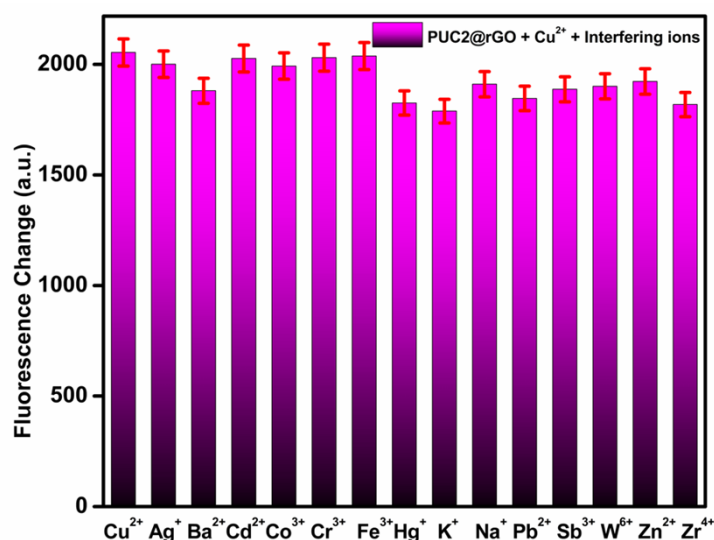

Figure S1: A bar graph illustrates the changes in fluorescence intensity of PUC2@rGO at 371 nm after adding Cu<sup>2+</sup> in presence interfering ions.

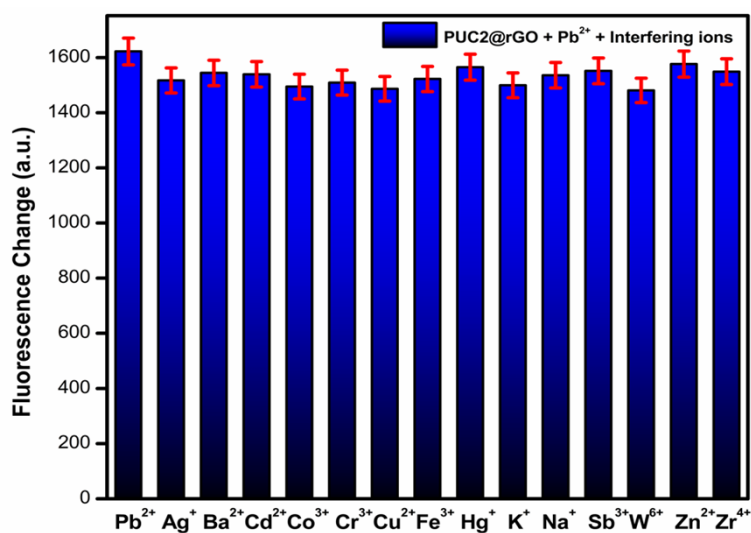

Figure S2: A bar graph illustrates the changes in fluorescence intensity of PUC2@rGO at 371 nm after adding Pb<sup>2+</sup> in presence interfering ions.

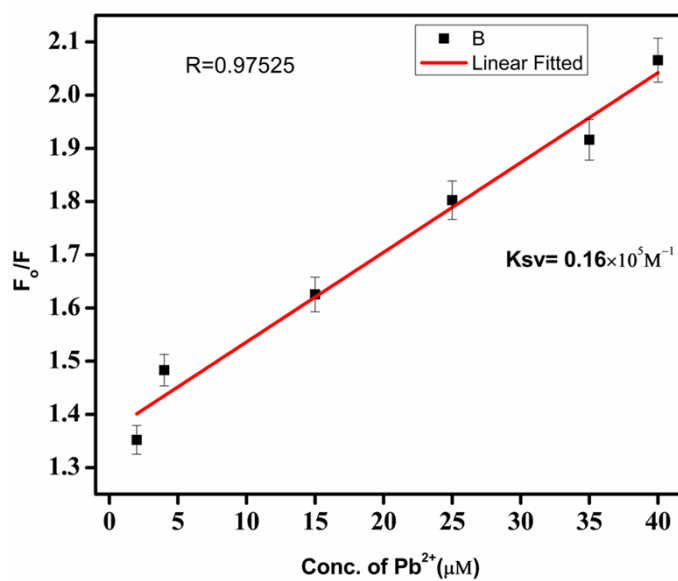

Figure S3: The Stern-Volmer plot, depicting  $F_0/F$  against  $[Pb^{2+}]$ , was employed to calculate the quenching constant ( $K_{sv}$ ) with a value of  $0.16 \times 10^5 M^{-1}$ .

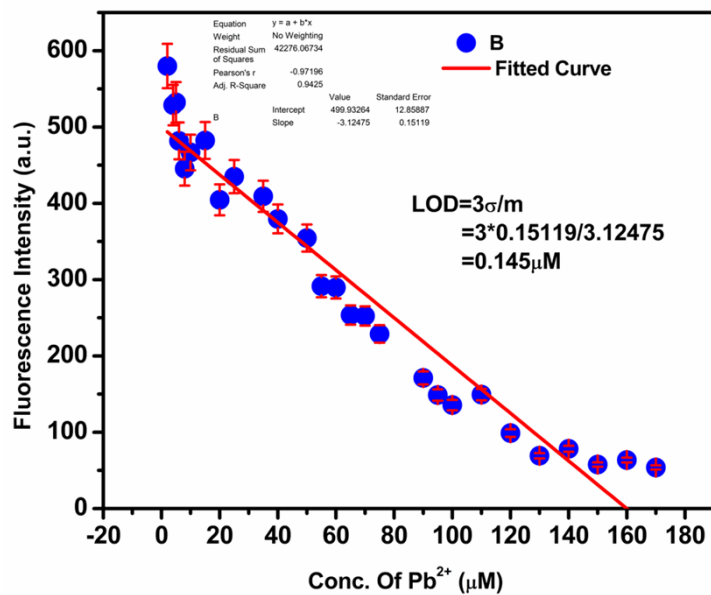

Figure S4: LOD estimation of Puc2@rGO for Pb<sup>2+</sup> ions.

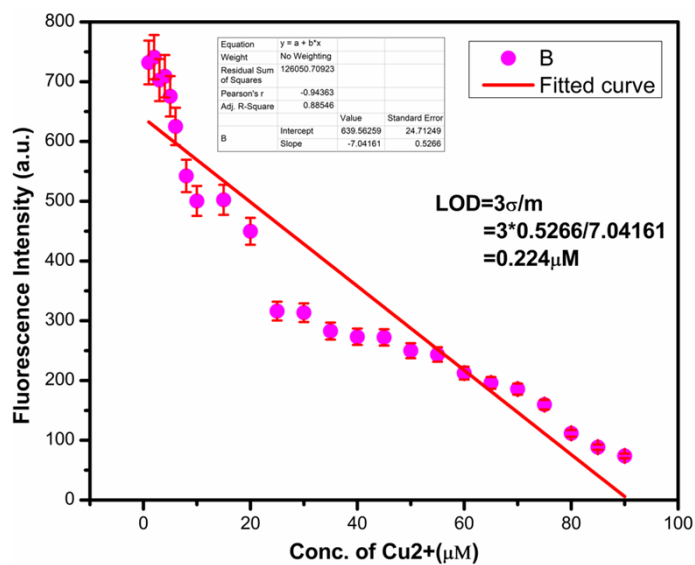

Figure S5: LOD estimation of Puc2@rGO for Cu<sup>2+</sup> ions.

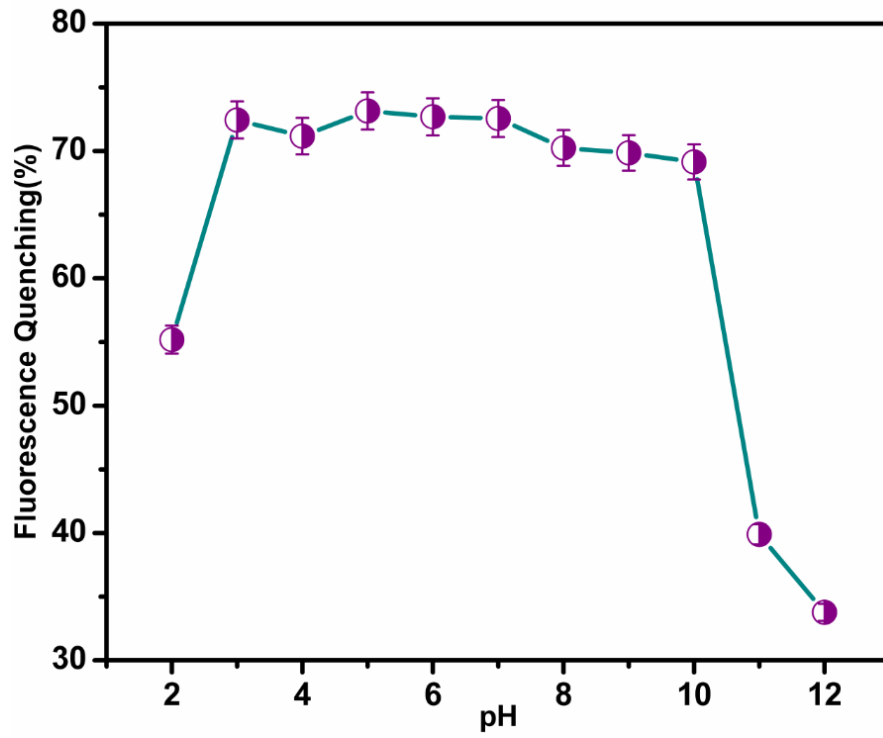

Figure S6: pH effect on the detection of Pb<sup>2+</sup> by PUC2@rGO.

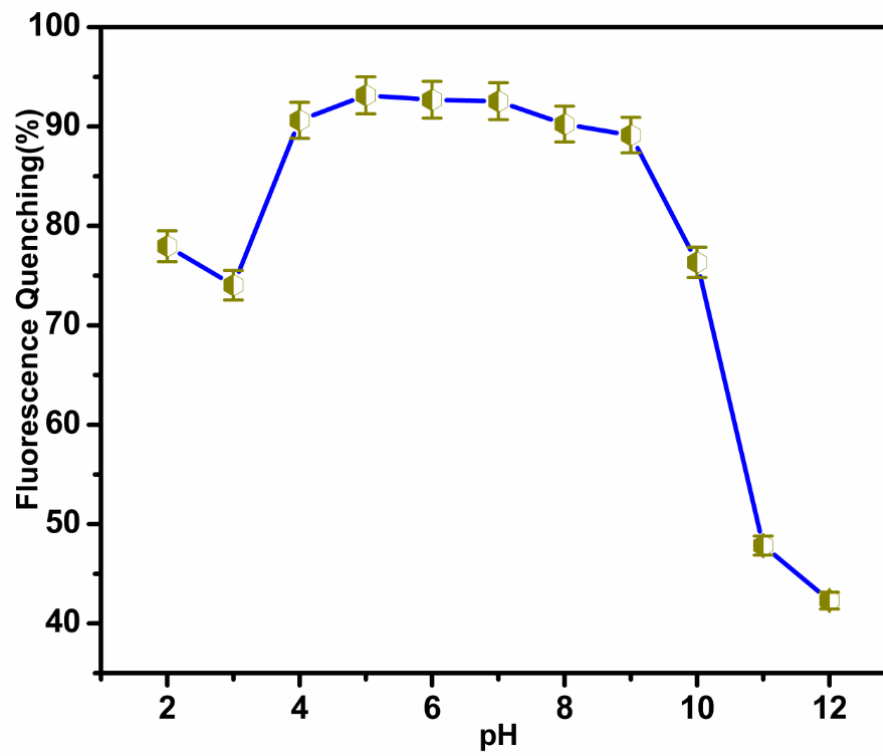

Figure S7: pH effect on the detection of Cu<sup>2+</sup> by PUC2@rGO.

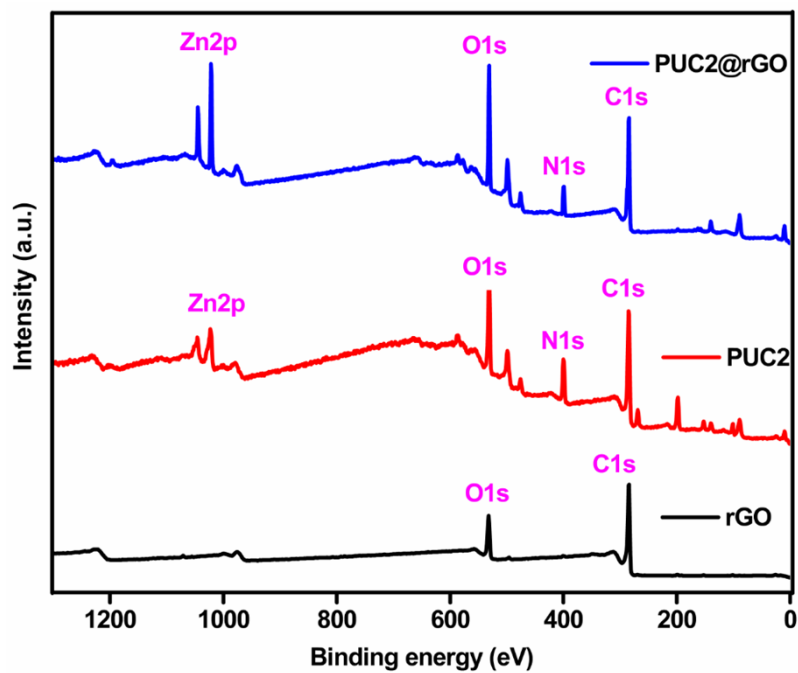

Figure S8. Comparison of XPS spectra of rGO with PUC2 and PUC2@rGO.

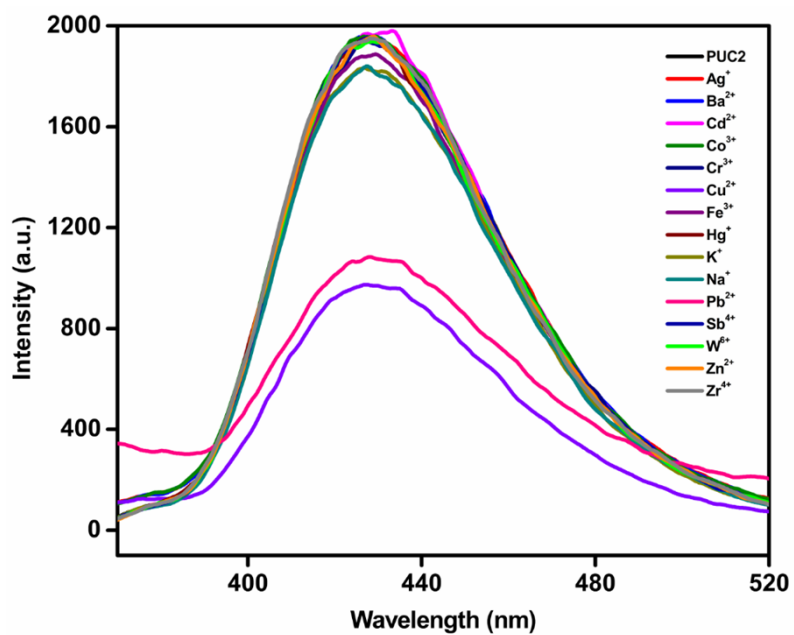

Figure 9: The fluorescence spectra of PUC2 were recorded before and after introducing heavy metal ions (100  $\mu$ M).

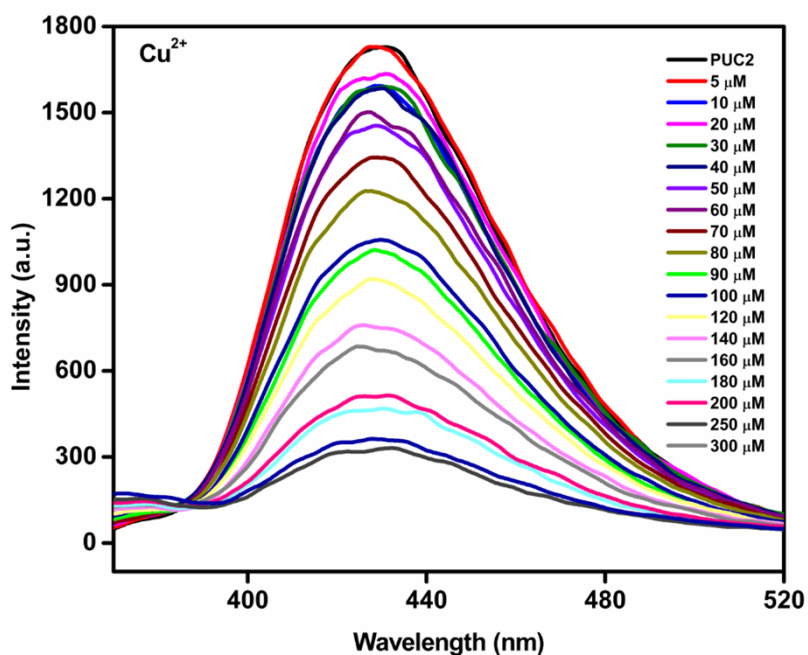

Figure 10: Emission spectra of PUC2 after the incremental addition of various concentrations of  $\text{Cu}^{2+}$  ions (ranging from 0 to 300  $\mu\text{M}$ ).

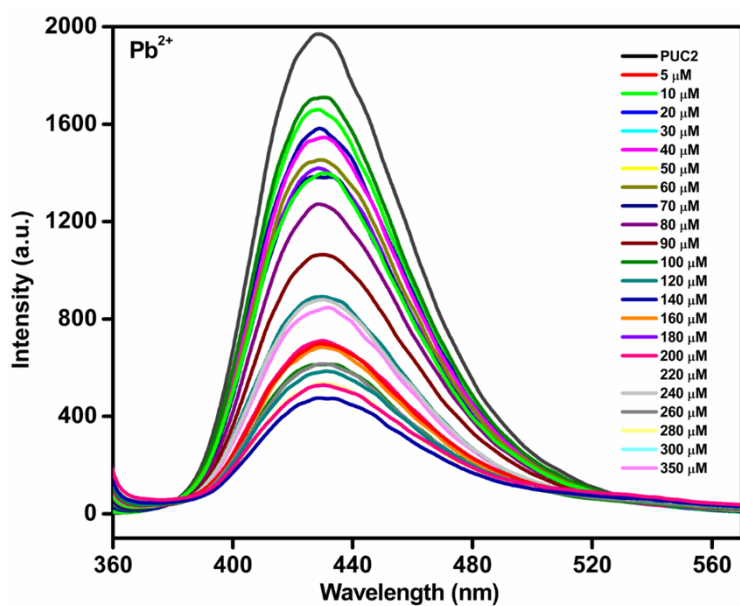

Figure 11: The emission spectra of PUC2 after the incremental addition of various concentrations of  $\text{Pb}^{2+}$  ions (ranging from 0 to 350  $\mu\text{M}$ ).
